# Supplementary material for: The evolution of substrate discrimination in macrolide antibiotic resistance enzymes
Source: PubMed Central journal article supplement (PMC5760710; doi:10.1038/s41467-017-02680-0), 2018-01-09
Supplement: 41467_2017_2680_MOESM1_ESM.pdf [file 41467_2017_2680_MOESM1_ESM.pdf]

**Supplementary Figures**

|      | MphA | MphB | MphC | MphE | MphF | MphG | MphH | MphI | MphJ | MphK | MphL | MphM | MphN |
|------|------|------|------|------|------|------|------|------|------|------|------|------|------|
| MphA |      |      |      |      |      |      |      |      |      |      |      |      |      |
| MphB | 37   |      |      |      |      |      |      |      |      |      |      |      |      |
| MphC | 33   | 51   |      |      |      |      |      |      |      |      |      |      |      |
| MphE | 34   | 33   | 31   |      |      |      |      |      |      |      |      |      |      |
| MphF | 40   | 33   | 34   | 35   |      |      |      |      |      |      |      |      |      |
| MphG | 38   | 39   | 36   | 58   | 38   |      |      |      |      |      |      |      |      |
| MphH | 40   | 35   | 30   | 31   | 42   | 36   |      |      |      |      |      |      |      |
| MphI | 38   | 43   | 41   | 35   | 36   | 39   | 39   |      |      |      |      |      |      |
| MphJ | 39   | 42   | 41   | 36   | 37   | 38   | 37   | 51   |      |      |      |      |      |
| MphK | 37   | 42   | 40   | 35   | 34   | 38   | 37   | 54   | 46   |      |      |      |      |
| MphL | 34   | 45   | 40   | 32   | 34   | 34   | 30   | 36   | 39   | 35   |      |      |      |
| MphM | 34   | 67   | 50   | 32   | 36   | 40   | 30   | 42   | 43   | 42   | 44   |      |      |
| MphN | 33   | 43   | 41   | 33   | 35   | 35   | 30   | 36   | 39   | 38   | 65   | 45   |      |
| MphO | 40   | 34   | 29   | 31   | 39   | 37   | 71   | 36   | 34   | 35   | 32   | 31   | 30   |

**Supplementary Figure 1:** Pair-wise sequence relationship of Mphs. Values are coloured from lowest (white) to highest (red), and the value is the pair-wise protein identity.

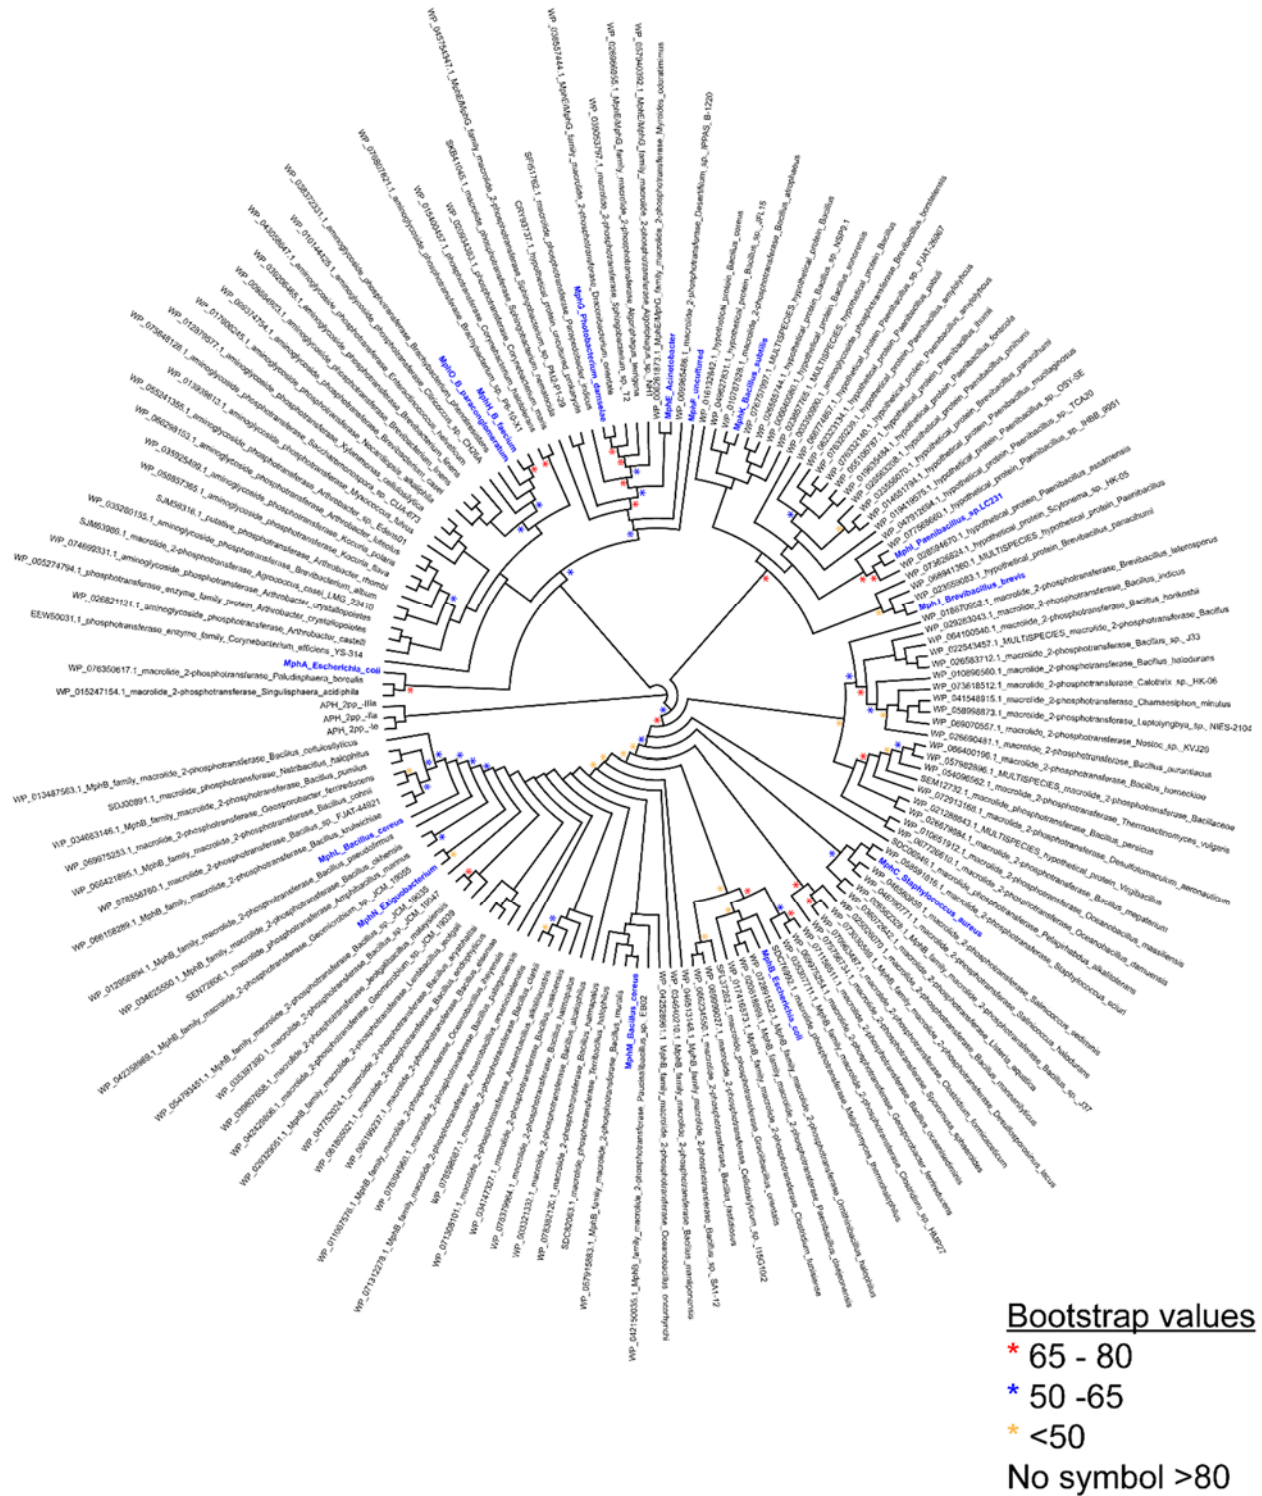

**Supplementary Figure 2:** Cladogram of the Mph family. This figure is identical to Figure 3, but with fully labelled leaves and bootstrap values. Bootstrap values above 80 are not shown for presentation.

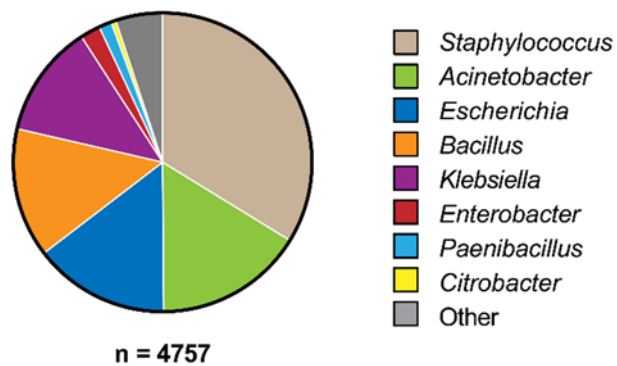

**Supplementary Figure 3:** Taxonomic distribution of all Mphs detected in RefSeq genomes.

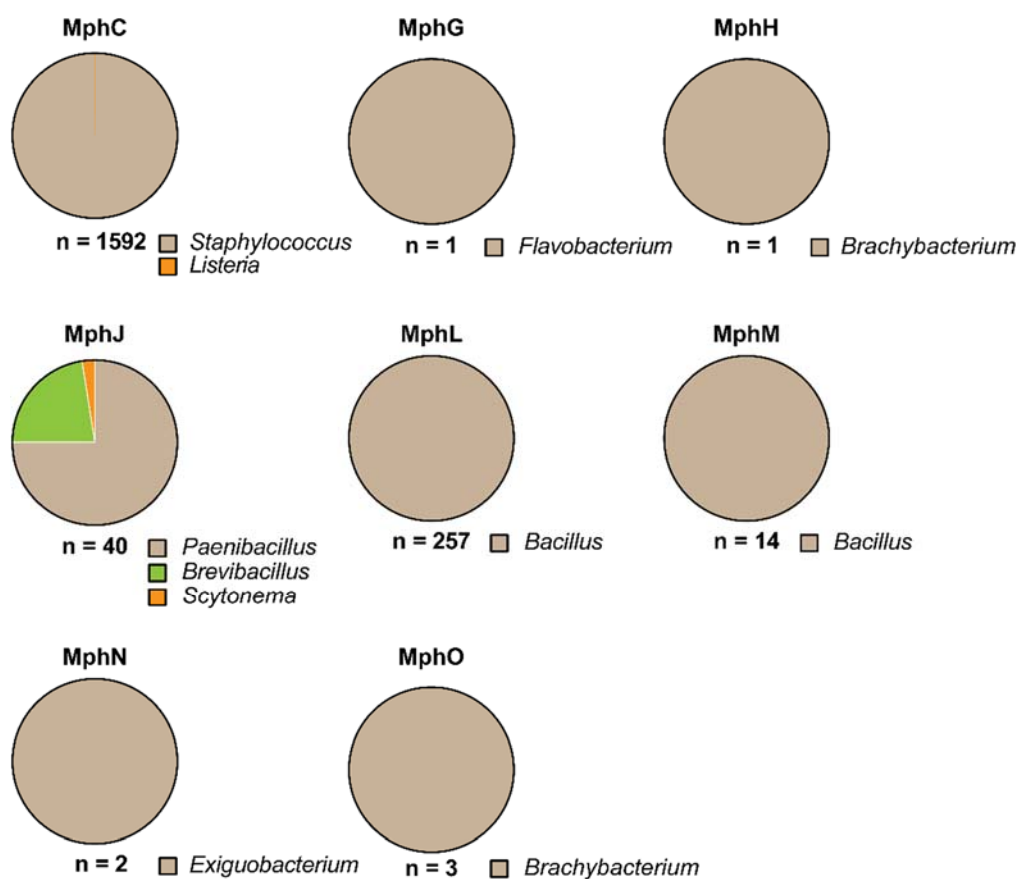

**Supplementary Figure 4:** Taxonomic distribution of Mph homologs within 80% sequence identity.

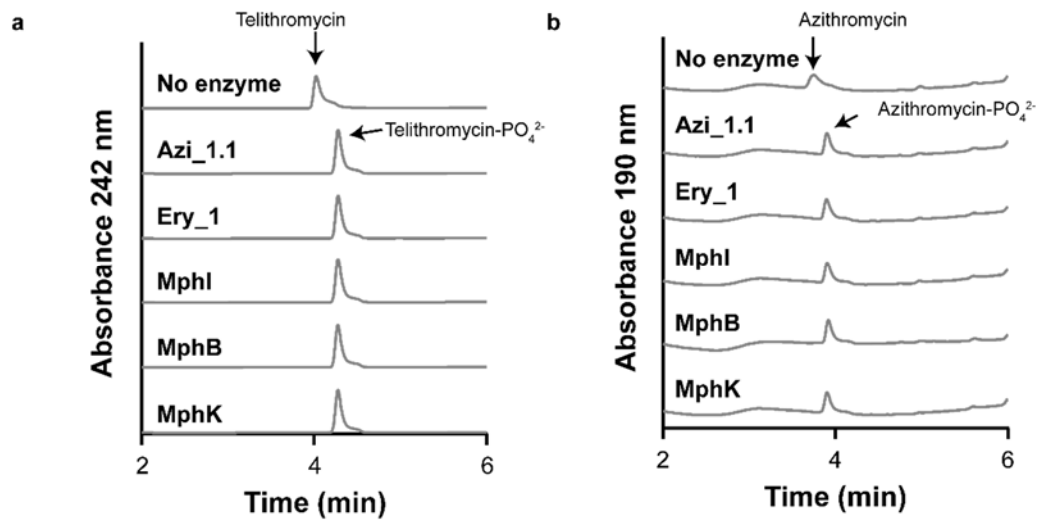

**Supplementary Figure 5:** Functional validation of Mphs. Enzyme reactions were analyzed with HPLC and confirmed to modify azithromycin (**a**) and telithromycin (**b**).

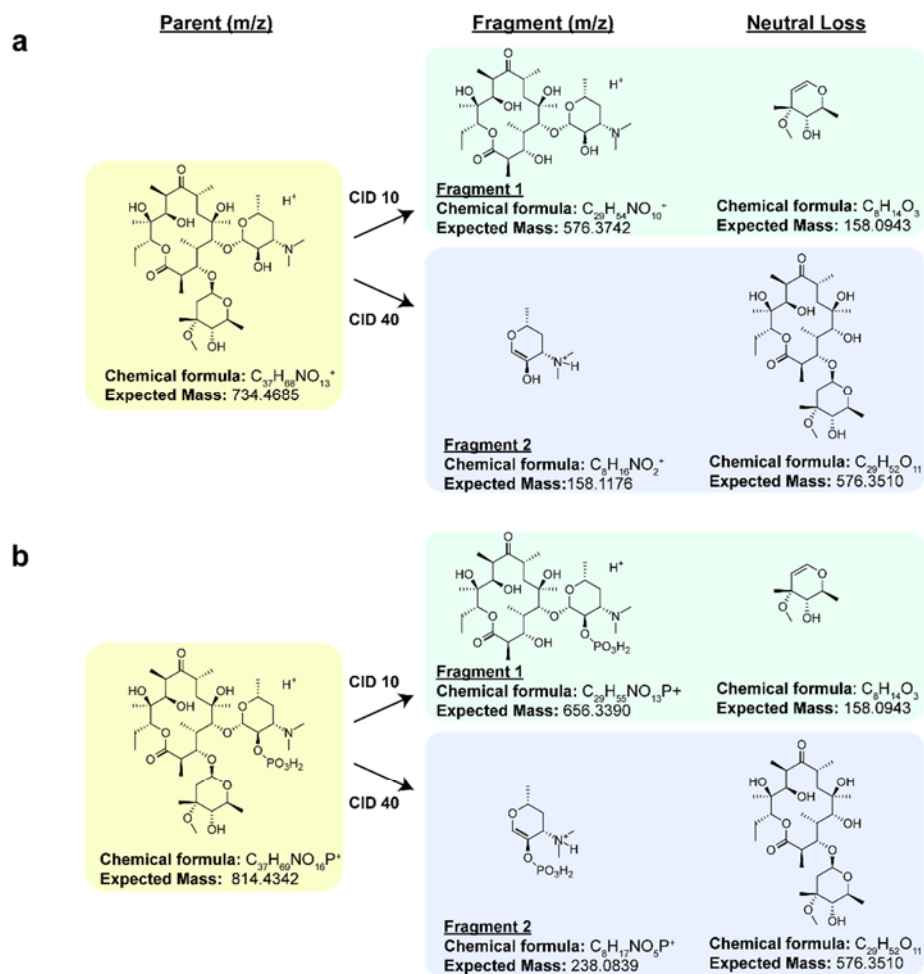

**c**

| Enzyme  | Fragment | <i>m/z</i> [M+H] <sup>+</sup><br>Substrate | <i>m/z</i> [M+H] <sup>+</sup><br>Product | Mass difference |
|---------|----------|--------------------------------------------|------------------------------------------|-----------------|
| MphB    | Parent   | 734.4687                                   | 814.4337                                 | 79.9650         |
|         | Frag. 1  | 576.3730                                   | 656.3390                                 | 79.9660         |
|         | Frag. 2  | 158.1174                                   | 238.0833                                 | 79.9659         |
| MphI    | Parent   | 734.4687                                   | 814.4344                                 | 79.9657         |
|         | Frag. 1  | 576.3730                                   | 656.3395                                 | 79.9665         |
|         | Frag. 2  | 158.1174                                   | 238.0831                                 | 79.9657         |
| MphK    | Parent   | 734.4687                                   | 814.4343                                 | 79.9656         |
|         | Frag. 1  | 576.3730                                   | 656.3391                                 | 79.9661         |
|         | Frag. 2  | 158.1174                                   | 238.0830                                 | 79.9656         |
| Azi_1.1 | Parent   | 734.4687                                   | 814.4340                                 | 79.9653         |
|         | Frag. 1  | 576.3730                                   | 656.3390                                 | 79.9660         |
|         | Frag. 2  | 158.1174                                   | 238.0834                                 | 79.9660         |
| Ery_1   | Parent   | 734.4687                                   | 814.4336                                 | 79.9649         |
|         | Frag. 1  | 576.3730                                   | 656.3388                                 | 79.9658         |
|         | Frag. 2  | 158.1174                                   | 238.0833                                 | 79.9659         |

**Supplementary Figure 6:** Structural characterization of phosphorylated macrolides. Fragmentation patterns of (a) erythromycin and (b) phosphorylated erythromycin. Charged fragments and neutral losses, and exact masses are shown. (c) Mass fragments observed using tandem mass spectrometry.

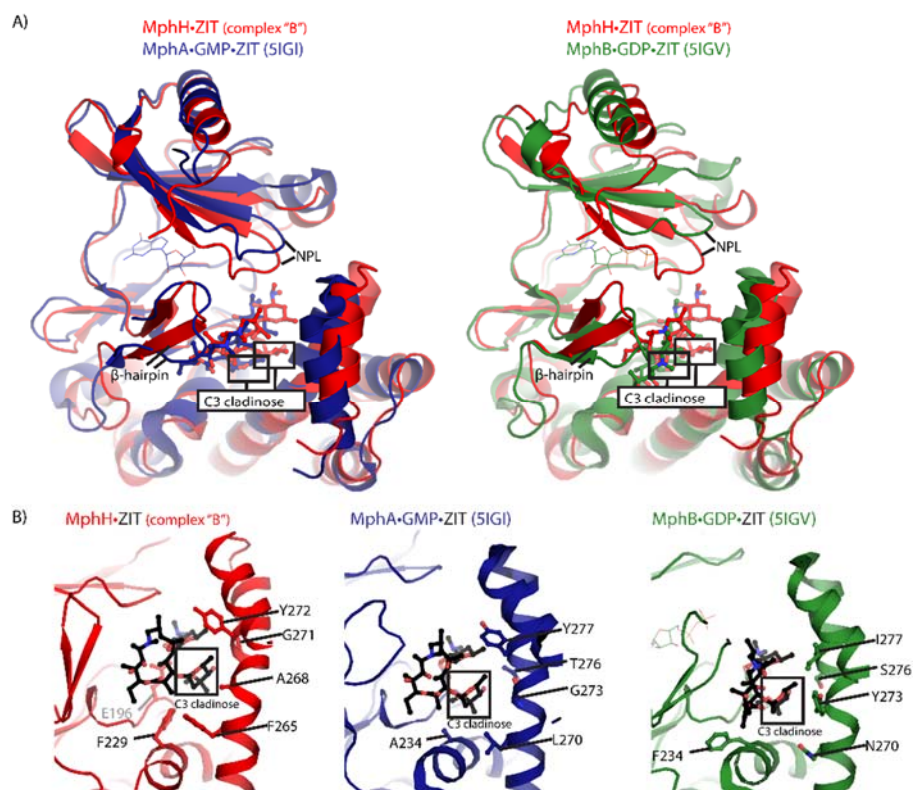

**Supplementary Figure 7:** (a) Crystal structure of MphB apoenzyme. (b) Superposition of crystal structures of MphB and MphH•azithromycin (complex "A"). (c) Electrostatic surface representations of MphB, MphH•azithromycin (complex "A") and MphH•azithromycin (complex "B").

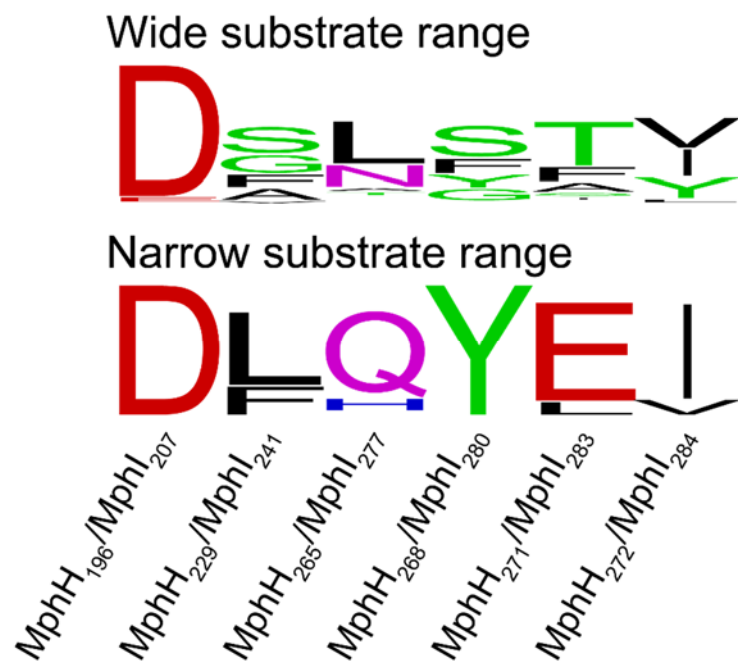

**Supplementary Figure 8:** Conservation of residues that contact the cladinose in the MphH crystal structure with azithromycin bound. Sequence conservation is displayed as a sequence logo created with WebLogo. Wide substrate range includes sequences in all clades except MphI and MphK; narrow substrate range includes sequences in only MphI and MphK clades.

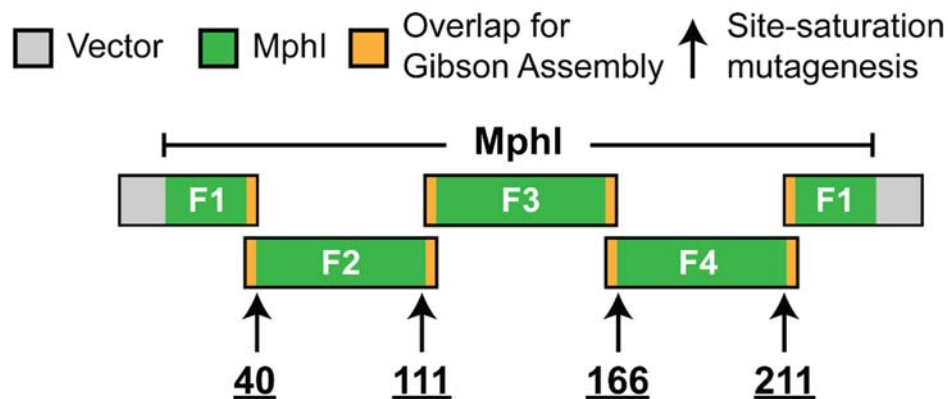

**Supplementary Figure 9:** Overview of the site-saturation combinatorial mutagenesis approach used to generate the MphI mutant library.

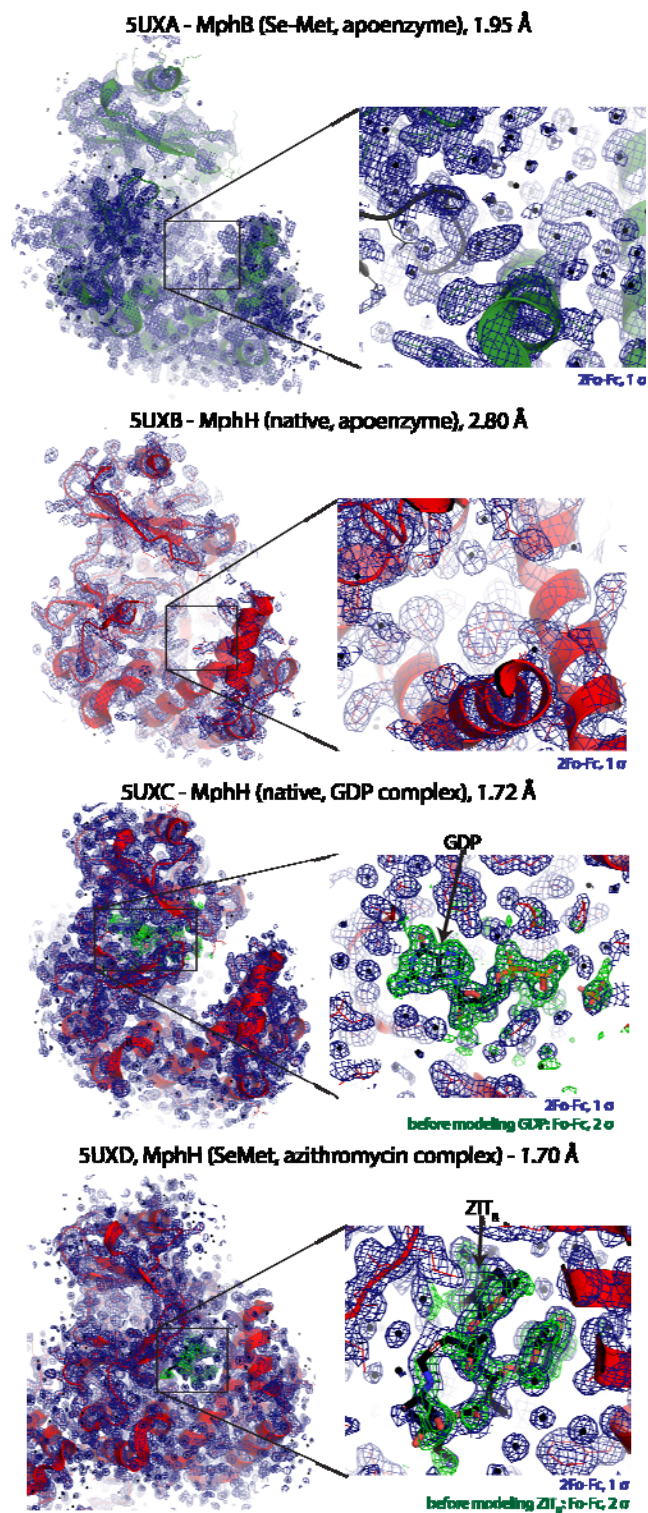

**Supplementary Figure 10:** Electron density map of crystal structures in this study.



## Supplementary Tables

**Supplementary Table 1:** Macrolide phosphotransferases used in this study and their revised nomenclature.

| Name              | Previous name              | Organism                                  | Accession      | Reference     | Location                    |
|-------------------|----------------------------|-------------------------------------------|----------------|---------------|-----------------------------|
| MphA              |                            | <i>Escherichia coli</i>                   | WP_023063803.1 | <sup>1</sup>  | Mobile element              |
| MphB              |                            | <i>Escherichia coli</i>                   | WP_000031017.1 | <sup>2</sup>  | Mobile element              |
| MphC              |                            | <i>Staphylococcus aureus</i>              | BAD86538.1     | <sup>3</sup>  | Mobile element              |
| MphE              |                            | uncultured                                | ABI20451.1     | <sup>4</sup>  | Mobile element              |
| MphF <sup>b</sup> | MphE                       | uncultured                                | CAJ98570.1     | <sup>5</sup>  | Mobile element              |
| MphG              |                            | <i>Photobacterium damsela</i>             | BAL43359.1     | <sup>6</sup>  | Mobile element              |
| MphH <sup>c</sup> | MphE                       | <i>Brachy bacterium faecium</i>           | WP_015776248.1 | <sup>7</sup>  | Chromosome                  |
| MphI              |                            | <i>Paenibacillus</i> sp. LC231            | KX531056.1     | <sup>8</sup>  | Chromosome                  |
| MphJ              |                            | <i>Brevibacillus brevis</i> VM4           | KY753883       | Submitted     | Chromosome                  |
| MphK              | YcbJ <sup>d</sup>          | <i>Bacillus subtilis</i> 168              | WP_003246254.1 | This study    | Chromosome                  |
| MphL              | <i>B. cereus</i> Cluster A | <i>Bacillus cereus</i>                    | WP_001094257.1 | <sup>9</sup>  | Chromosome                  |
| MphM              | <i>B. cereus</i> Cluster B | <i>Bacillus cereus</i>                    | WP_001041372.1 | <sup>9</sup>  | Mobile element <sup>a</sup> |
| MphN              | mph_like                   | <i>Exiguobacterium</i> sp. S3-2           | AHE40505.1     | <sup>10</sup> | Mobile element              |
| MphO <sup>c</sup> | MphE                       | <i>Brachy bacterium paraconglomeratum</i> | WP_050815728.1 | <sup>7</sup>  | Chromosome                  |

<sup>a</sup>The upstream and downstream region of MphM was similar to *Bacillus thurengiensis* plasmids, but was not conclusively shown to be on a plasmid.

<sup>b</sup>MphF was originally annotated MphE, but renamed in ref. <sup>11</sup> because MphE already existed.

<sup>c</sup>MphH and MphO were both originally named MphE in ref. <sup>7</sup>, but were renamed in this study because MphE already existed. Furthermore, according to the macrolide resistance nomenclature proposed in ref. <sup>12</sup>, MphH and MphO were assigned different names because they share <80% identity.

<sup>d</sup>MphK was annotated as YcbJ in standard *Bacillus subtilis* gene nomenclature<sup>13</sup>.

**Supplementary Table 2:** Antibiotic susceptibility of *mphs* expressed in *E. coli* TOP10.

| Antibiotic     | Empty vector | <i>mphB</i> | <i>mphK</i> | <i>mphH</i> | <i>mphI</i> |
|----------------|--------------|-------------|-------------|-------------|-------------|
| Erythromycin   | 64           | 256         | 64          | 64 - 128    | 64          |
| Clarithromycin | 64           | >128        | 64          | 128         | 64          |
| Azithromycin   | 4            | 16          | 4           | 4           | 4           |
| Telithromycin  | 8            | 512         | 256         | 16          | 512         |
| Spiramycin     | 256          | 1024        | 512         | 256         | 1024        |
| Tylosin        | 512          | >2048       | 2048        | 1024        | >2048       |
| Kanamycin      | 0.5          | 0.5         | 0.5         | 0.5         | 0.5         |

**Supplementary Table 3:** Mass characterization of macrolide antibiotics modified by Mphs.

| <b>Resistance enzyme</b> | <b>Substrate</b> | <b><i>m/z</i><br/>(substrate)</b> | <b><i>m/z</i><br/>(product)</b> | <b>Mass<br/>difference</b> |
|--------------------------|------------------|-----------------------------------|---------------------------------|----------------------------|
| MphB                     | Azithromycin     | 749.2                             | 829.1                           | 79.9                       |
|                          | Telithromycin    | 812.3                             | 892.3                           | 80.0                       |
| MphI                     | Azithromycin     | 749.2                             | 829.1                           | 79.9                       |
|                          | Telithromycin    | 812.3                             | 892.2                           | 79.9                       |
| MphK                     | Azithromycin     | 749.2                             | 829.2                           | 80.0                       |
|                          | Telithromycin    | 812.3                             | 892.2                           | 79.9                       |
| Azi_1.1                  | Azithromycin     | 749.2                             | 829.1                           | 79.9                       |
|                          | Telithromycin    | 812.3                             | 892.3                           | 80.0                       |
| Ery_1                    | Azithromycin     | 749.2                             | 829.2                           | 80.0                       |
|                          | Telithromycin    | 812.3                             | 892.3                           | 80.0                       |

**Supplementary Table 4: X-ray diffraction data collection and refinement statistics**

| Structure                                                | MphB (Se-Met, apoenzyme)   | MphB (native, apoenzyme)                      | MphH (native)•GDP+P <sub>i</sub> complex      | MphH (Se-Met)•azithromycin complex |
|----------------------------------------------------------|----------------------------|-----------------------------------------------|-----------------------------------------------|------------------------------------|
| PDB Code                                                 | 5UXA                       | 5UXB                                          | 5UXC                                          | 5UXD                               |
| <b>Data collection</b>                                   |                            |                                               |                                               |                                    |
| Space group                                              | C222 <sub>1</sub>          | P2 <sub>1</sub> 2 <sub>1</sub> 2 <sub>1</sub> | P2 <sub>1</sub> 2 <sub>1</sub> 2 <sub>1</sub> | P 2 <sub>1</sub>                   |
| Cell dimensions ( <i>a</i> , <i>b</i> , <i>c</i> Å; β °) | 67.28, 116.68, 92.58; 90   | 75.93, 79.74, 99.13; 90                       | 49.56, 77.00, 94.41; 90                       | 55.05, 81.21, 71.34; 96.83         |
| Resolution, Å                                            | 30.00 – 1.95               | 30.00 – 2.80                                  | 43.88 – 1.72                                  | 70.83 – 1.70                       |
| R <sub>merge</sub> <sup>a</sup>                          | 0.092 (0.793) <sup>b</sup> | 0.143 (0.593)                                 | 0.086 (0.588)                                 | 0.086 (0.845)                      |
| R <sub>pin</sub>                                         | 0.033 (0.282)              | 0.048 (0.200)                                 | 0.069 (0.480)                                 | 0.043 (0.417)                      |
| CC <sub>1/2</sub>                                        | (0.905) <sup>b</sup>       | (0.962)                                       | (0.994)                                       | (0.706)                            |
| <i>I</i> / σ( <i>I</i> )                                 | 24.9 (3.5)                 | 16.3 (3.8)                                    | 9.1 (2.4)                                     | 10.4 (1.6)                         |
| Completeness, %                                          | 100 (100)                  | 99.9 (100)                                    | 99.9 (100)                                    | 98.1 (100)                         |
| Redundancy                                               | 8.6 (8.7)                  | 9.6 (9.5)                                     | 4.0 (4.0)                                     | 4.9 (5.0)                          |
| <b>Refinement</b>                                        |                            |                                               |                                               |                                    |
| Resolution, Å                                            | 29.17 – 1.94               | 28.75 – 2.79                                  | 40.24 – 1.72                                  | 45.35 – 1.70                       |
| No. of unique reflections:                               | 26109, 1916                | 15089, 1243                                   | 39023, 1903                                   | 67224, 3938                        |
| working, test                                            |                            |                                               |                                               |                                    |
| <i>R</i> -factor/free <i>R</i> -factor <sup>c</sup>      | 15.1/20.1 (18.9/25.9)      | 21.9/25.2 (26.4/30.6)                         | 16.4/20.7 (27.0/35.7)                         | 19.2/23.2 (29.4/33.6)              |
| No. of refined atoms, molecules                          | 2440, 1                    | 4463, 2                                       | 2286, 1                                       | 4625, 2                            |
| Protein                                                  | N/A                        | N/A                                           | 1                                             | N/A                                |
| Magnesium                                                | N/A                        | N/A                                           | 28, 1                                         | N/A                                |
| GDP                                                      | 3                          | 4                                             | 142                                           | 16                                 |
| Other solvent                                            |                            |                                               |                                               |                                    |

| Structure         | MphB (Se-Met, apoenzyme) | MphB (native, apoenzyme) | MphH (native)•GDP+P <sub>i</sub> complex | MphH (Se-Met)•azithromycin complex |
|-------------------|--------------------------|--------------------------|------------------------------------------|------------------------------------|
| PDB Code          | 5UXA                     | 5UXB                     | 5UXC                                     | 5UXD                               |
| Water             | 461                      | 118                      | 486                                      | 1301                               |
| <i>B</i> -factors |                          |                          |                                          |                                    |
| Protein           | 42.8                     | 47.8                     | 22.8                                     | 26.11                              |
| Magnesium         | N/A                      | N/A                      | 13.4                                     | N/A                                |
| GDP               | N/A                      | N/A                      | 23.4                                     | N/A                                |
| Other solvent     | 38.4                     | 42.1                     | 42.7                                     | 37.1                               |
| Water             | 46.3                     | 38.9                     | 39.6                                     | 39.5                               |
| r.m.s.d.          |                          |                          |                                          |                                    |
| Bond lengths, Å   | 0.016                    | 0.003                    | 0.015                                    | 0.006                              |
| Bond angles, °    | 1.156                    | 0.565                    | 1.497                                    | 0.940                              |

<sup>a</sup> $R_{\text{sym}} = \sum_h \sum_i |I_i(h) - \langle I(h) \rangle| / \sum_h \sum_i I_i(h)$ , where  $I_i(h)$  and  $\langle I(h) \rangle$  are the  $i$ th and mean measurement of the intensity of reflection  $h$ .

<sup>b</sup>Figures in parentheses indicate the values for the outer shells of the data.

<sup>c</sup> $R = \sum |F_p^{\text{obs}} - F_p^{\text{calc}}| / \sum F_p^{\text{obs}}$ , where  $F_p^{\text{obs}}$  and  $F_p^{\text{calc}}$  are the observed and calculated structure factor amplitudes, respectively.

**Supplementary Table 5:** Steady-state kinetics of MphI.

| Substrate     | $K_m$ (μM) | $k_{\text{cat}}$ (s <sup>-1</sup> ) | $K_i$ (μM) | $k_{\text{cat}}/K_m$        |
|---------------|------------|-------------------------------------|------------|-----------------------------|
| Erythromycin  | 110 ± 10   | 0.012 ± 0.001                       |            | $(1.0 \pm 0.1) \times 10^2$ |
| Azithromycin  | 56 ± 3     | 0.0217 ± 0.0003                     |            | $(3.9 \pm 0.2) \times 10^2$ |
| Roxithromycin | 32 ± 4     | 0.0030 ± 0.0001                     |            | $(9.1 \pm 1.1) \times 10^1$ |
| Telithromycin | 3.0 ± 0.5  | 0.99 ± 0.03                         |            | $(3.3 \pm 0.5) \times 10^5$ |
| Tylosin       | 2.5 ± 0.7  | 0.46 ± 0.02                         |            | $(1.8 \pm 0.5) \times 10^5$ |
| Spiramycin    | 8.1 ± 1.8  | 1.7 ± 0.2                           | 300 ± 90   | $(2.1 \pm 0.5) \times 10^5$ |
| Josamycin     | 30 ± 8     | 4.7 ± 0.6                           | 640 ± 240  | $(1.6 \pm 0.5) \times 10^5$ |
| GTP           | 10 ± 1     | 1.02 ± 0.02                         |            | $(1.0 \pm 0.1) \times 10^5$ |

**Supplementary Table 6:** Steady-state kinetics of MphK.

| Substrate     | $K_m$ ( $\mu\text{M}$ ) | $k_{\text{cat}}$ ( $\text{s}^{-1}$ ) | $K_i$ ( $\mu\text{M}$ ) | $k_{\text{cat}}/K_m$        |
|---------------|-------------------------|--------------------------------------|-------------------------|-----------------------------|
| Erythromycin  | -                       | -                                    | -                       | -                           |
| Azithromycin  | $940 \pm 320$           | $0.025 \pm 0.005$                    |                         | $(2.6 \pm 1.1) \times 10^1$ |
| Roxithromycin | $100 \pm 25$            | $0.0050 \pm 0.0004$                  |                         | $(4.9 \pm 1.2) \times 10^1$ |
| Telithromycin | $4.2 \pm 0.45$          | $0.056 \pm 0.001$                    |                         | $(1.3 \pm 0.1) \times 10^4$ |
| Tylosin       | $6.3 \pm 2.4$           | $0.0022 \pm 0.0002$                  |                         | $(3.5 \pm 1.4) \times 10^2$ |
| Spiramycin    | $7.9 \pm 1.1$           | $0.044 \pm 0.002$                    | $750 \pm 160$           | $(5.7 \pm 0.9) \times 10^3$ |
| Josamycin     | $6.389 \pm 1.938$       | $0.097 \pm 0.016$                    | $37 \pm 12$             | $(1.5 \pm 0.5) \times 10^4$ |
| GTP           | $17 \pm 1$              | $0.0491 \pm 0.0004$                  |                         | $(3.0 \pm 0.1) \times 10^3$ |

**Supplementary Table 7:** Antibiotic susceptibility of *mphs* expressed in *E. coli* BW25113  $\Delta\text{bamB}\Delta\text{tolC}$ .

| Antibiotic     | Empty vector | <i>mphB</i> | <i>mphK</i> | <i>mphH</i> | <i>mphI</i> |
|----------------|--------------|-------------|-------------|-------------|-------------|
| Erythromycin   | 0.5          | 64          | 1           | 16          | 1           |
| Clarithromycin | 0.5          | 32          | 0.5         | 16          | 1           |
| Azithromycin   | 0.063        | 4           | 0.25        | 0.5         | 0.25        |
| Telithromycin  | 0.125        | >16         | >16         | 4           | >16         |
| Spiramycin     | 2            | 256         | 256         | 16          | 256         |
| Tylosin        | 2            | 1024        | 512         | 64          | 1024        |
| Josamycin      | 2-4          | >64         | 64          | 8           | >64         |
| Kanamycin      | 1            | 1           | 1           | 1           | 1           |

**Supplementary Table 8:** Steady-state kinetics of MphB.

| Substrate     | $K_m$ ( $\mu\text{M}$ ) | $k_{\text{cat}}$ ( $\text{s}^{-1}$ ) | $K_i$ ( $\mu\text{M}$ ) | $k_{\text{cat}}/K_m$        |
|---------------|-------------------------|--------------------------------------|-------------------------|-----------------------------|
| Erythromycin  | $1.6 \pm 0.2$           | $0.0412 \pm 0.0009$                  |                         | $(2.5 \pm 0.3) \times 10^4$ |
| Azithromycin  | $2.9 \pm 0.36$          | $0.189 \pm 0.004$                    |                         | $(6.6 \pm 0.8) \times 10^4$ |
| Roxithromycin | $1.5 \pm 0.4$           | $0.025 \pm 0.001$                    | $960 \pm 510$           | $(1.7 \pm 0.4) \times 10^4$ |
| Telithromycin | $6.6 \pm 1.8$           | $0.77 \pm 0.04$                      |                         | $(1.2 \pm 0.3) \times 10^5$ |
| Tylosin       | $1.8 \pm 0.4$           | $0.070 \pm 0.005$                    | $350 \pm 160$           | $(9.4 \pm 4.5) \times 10^4$ |
| Spiramycin    | $2.0 \pm 0.9$           | $0.11 \pm 0.02$                      | $39 \pm 16$             | $(5.5 \pm 2.7) \times 10^4$ |
| Josamycin     | $0.83 \pm 0.27$         | $1.2 \pm 0.1$                        | $94 \pm 27$             | $(1.5 \pm 0.5) \times 10^6$ |
| GTP           | $8.3 \pm 0.45$          | $0.602 \pm 0.008$                    |                         | $(7.3 \pm 0.4) \times 10^4$ |

**Supplementary Table 9:** Antibiotic susceptibility of MphI and single mutations identified with ancestral sequence reconstruction expressed in *E. coli* BW25113  $\Delta$ *bamB* $\Delta$ *tolC*.

| Antibiotic     | <i>mphI</i> | <i>mphI</i> <sub>M40L</sub> | <i>mphI</i> <sub>S111T</sub> | <i>mphI</i> <sub>T166M</sub> | <i>mphI</i> <sub>P211G</sub> |
|----------------|-------------|-----------------------------|------------------------------|------------------------------|------------------------------|
| Erythromycin   | 1           | 1                           | 1                            | 1                            | 1                            |
| Clarithromycin | 1           | 1                           | 1-2                          | 1                            | 1                            |
| Azithromycin   | 0.25        | 0.25                        | 0.25-0.5                     | 0.25-0.5                     | 0.25                         |
| Telithromycin  | >16         | >16                         | >16                          | >16                          | >16                          |
| Spiramycin     | 256         | 256                         | 256                          | 256                          | 256                          |
| Tylosin        | 1024        | 1024                        | 1024                         | 1024                         | 1024                         |
| Josamycin      | >64         | >64                         | >64                          | >64                          | >64                          |
| Kanamycin      | 1           | 1                           | 1                            | 1                            | 1                            |

**Supplementary Table 10:** Antibiotic susceptibility of *mphI* and two library mutants with expanded resistance to C3 cladinose macrolides expressed in *E. coli* TOP10.

| Antibiotic     | <i>mphI</i> | <i>azi_1.1</i> <sup>a</sup> | <i>ery_1</i> <sup>b</sup> |
|----------------|-------------|-----------------------------|---------------------------|
| Erythromycin   | 64          | 128                         | 128                       |
| Clarithromycin | 64          | 64                          | 64                        |
| Azithromycin   | 4           | 16                          | 16                        |
| Telithromycin  | 512         | 512                         | 512                       |
| Spiramycin     | 1024        | 2048                        | 2048                      |
| Tylosin        | >2048       | >2048                       | >2048                     |
| Kanamycin      | 0.5         | 0.5                         | 0.5                       |

a - MphI<sub>M40A/S111G/T166E/P211L</sub>

b - MphI<sub>M40A/S111R/T166E/P211L</sub>

**Supplementary Table 11:** Steady-state kinetics of the MphI mutant Azi\_1.1 (MphI<sub>M40A/S111G/T166E/P211L</sub>).

| Substrate     | $K_m$ ( $\mu$ M) | $k_{cat}$ ( $s^{-1}$ ) | $k_{cat}/K_m$                 |
|---------------|------------------|------------------------|-------------------------------|
| Erythromycin  | 46 $\pm$ 6       | 0.197 $\pm$ 0.007      | (4.3 $\pm$ 0.6) $\times 10^3$ |
| Azithromycin  | 34 $\pm$ 4       | 0.47 $\pm$ 0.01        | (1.4 $\pm$ 0.2) $\times 10^4$ |
| Roxithromycin | 19 $\pm$ 3       | 0.153 $\pm$ 0.004      | (7.9 $\pm$ 1.1) $\times 10^3$ |
| Telithromycin | 2.0 $\pm$ 0.2    | 0.376 $\pm$ 0.007      | (1.8 $\pm$ 0.2) $\times 10^5$ |
| Tylosin       | 4.0 $\pm$ 0.6    | 0.131 $\pm$ 0.003      | (3.2 $\pm$ 0.5) $\times 10^4$ |
| Spiramycin    | 4.2 $\pm$ 0.3    | 0.347 $\pm$ 0.005      | (8.2 $\pm$ 0.6) $\times 10^4$ |
| Josamycin     | 4.1 $\pm$ 0.7    | 0.174 $\pm$ 0.006      | (4.3 $\pm$ 0.7) $\times 10^4$ |
| GTP           | 5 $\pm$ 0.3      | 0.450 $\pm$ 0.005      | (8.3 $\pm$ 0.4) $\times 10^4$ |

**Supplementary Table 12:** Steady-state kinetics of MphI mutant Ery\_1 (MphI<sub>M40A/S111R/T166E/P211L</sub>).

| Substrate     | $K_m$ ( $\mu\text{M}$ ) | $k_{\text{cat}}$ ( $\text{s}^{-1}$ ) | $K_i$ ( $\mu\text{M}$ ) | $k_{\text{cat}}/K_m$        |
|---------------|-------------------------|--------------------------------------|-------------------------|-----------------------------|
| Erythromycin  | $75 \pm 8$              | $0.19 \pm 0.01$                      |                         | $(2.6 \pm 0.3) \times 10^3$ |
| Azithromycin  | $32 \pm 2$              | $0.56 \pm 0.01$                      |                         | $(1.8 \pm 0.1) \times 10^4$ |
| Roxithromycin | $46 \pm 3$              | $0.145 \pm 0.002$                    |                         | $(3.2 \pm 0.2) \times 10^3$ |
| Telithromycin | $5.6 \pm 1.1$           | $0.72 \pm 0.03$                      |                         | $(1.3 \pm 0.3) \times 10^5$ |
| Tylosin       | $5.4 \pm 0.75$          | $0.32 \pm 0.01$                      |                         | $(5.9 \pm 0.8) \times 10^4$ |
| Spiramycin    | $15 \pm 5$              | $1.3 \pm 0.2$                        | $210 \pm 90$            | $(8.7 \pm 3.2) \times 10^4$ |
| Josamycin     | $20 \pm 3$              | $0.45 \pm 0.02$                      |                         | $(2.2 \pm 0.4) \times 10^4$ |
| GTP           | $5.1 \pm 0.3$           | $0.71 \pm 0.01$                      |                         | $(1.4 \pm 0.8) \times 10^5$ |

**Supplementary Table 13:** Steady-state kinetics of MphI<sub>S111R/T166E/P211L</sub>.

| Substrate     | $K_m$         | $k_{\text{cat}}$ ( $\text{s}^{-1}$ ) | $K_i$ ( $\mu\text{M}$ ) | $k_{\text{cat}}/K_m$        |
|---------------|---------------|--------------------------------------|-------------------------|-----------------------------|
| Erythromycin  | $140 \pm 20$  | $0.0114 \pm 0.0004$                  |                         | $(7.9 \pm 1.1) \times 10^1$ |
| Azithromycin  | $93 \pm 5$    | $0.0490 \pm 0.0008$                  |                         | $(5.3 \pm 0.3) \times 10^2$ |
| Roxithromycin | $60 \pm 8$    | $0.0054 \pm 0.0002$                  |                         | $(9.0 \pm 1.2) \times 10^1$ |
| Telithromycin | $5.0 \pm 0.7$ | $0.154 \pm 0.004$                    |                         | $(3.1 \pm 0.5) \times 10^4$ |
| Tylosin       | $4.6 \pm 0.9$ | $0.21 \pm 0.01$                      | $700 \pm 260$           | $(4.5 \pm 0.9) \times 10^4$ |
| Spiramycin    | $11 \pm 2.1$  | $0.53 \pm 0.04$                      | $1500 \pm 600$          | $(4.9 \pm 1.0) \times 10^4$ |
| Josamycin     | $34 \pm 3$    | $0.95 \pm 0.02$                      |                         | $(2.8 \pm 0.2) \times 10^4$ |
| GTP           | $3.0 \pm 0.5$ | $0.090 \pm 0.003$                    |                         | $(3.0 \pm 0.5) \times 10^4$ |

**Supplementary Table 14:** Steady-state kinetics of MphI<sub>M40A/S111R/T166E</sub>.

| Substrate     | $K_m$ ( $\mu\text{M}$ ) | $k_{\text{cat}}$ ( $\text{s}^{-1}$ ) | $K_i$ ( $\mu\text{M}$ ) | $k_{\text{cat}}/K_m$        |
|---------------|-------------------------|--------------------------------------|-------------------------|-----------------------------|
| Erythromycin  | $79 \pm 14$             | $0.020 \pm 0.001$                    |                         | $(2.6 \pm 0.6) \times 10^2$ |
| Azithromycin  | $83 \pm 6$              | $0.094 \pm 0.002$                    |                         | $(1.1 \pm 0.1) \times 10^3$ |
| Roxithromycin | $100 \pm 30$            | $0.0099 \pm 0.0008$                  |                         | $(9.7 \pm 2.7) \times 10^1$ |
| Telithromycin | $5.5 \pm 0.8$           | $1.68 \pm 0.05$                      |                         | $(3.1 \pm 0.4) \times 10^5$ |
| Tylosin       | $9.4 \pm 2.7$           | $0.70 \pm 0.11$                      | $67 \pm 22$             | $(7.4 \pm 2.4) \times 10^4$ |
| Spiramycin    | $6.9 \pm 1.0$           | $1.40 \pm 0.04$                      |                         | $(2.0 \pm 0.3) \times 10^5$ |
| Josamycin     | $14 \pm 3$              | $1.8 \pm 0.07$                       |                         | $(1.2 \pm 0.3) \times 10^5$ |
| GTP           | $16 \pm 1$              | $0.78 \pm 0.01$                      |                         | $(5.0 \pm 0.4) \times 10^4$ |

**Supplementary Table 15:** Steady-state kinetics of MphI<sub>S111R/T166E</sub>.

| Substrate     | $K_m$ ( $\mu\text{M}$ ) | $k_{\text{cat}}$ ( $\text{s}^{-1}$ ) | $K_i$ ( $\mu\text{M}$ ) | $k_{\text{cat}}/K_m$          |
|---------------|-------------------------|--------------------------------------|-------------------------|-------------------------------|
| Erythromycin  | $157 \pm 9$             | $0.0202 \pm 0.0004$                  |                         | $(1.28 \pm 0.07) \times 10^2$ |
| Azithromycin  | $114 \pm 7$             | $0.099 \pm 0.002$                    |                         | $(8.6 \pm 0.5) \times 10^2$   |
| Roxithromycin | $46 \pm 5$              | $0.0066 \pm 0.0001$                  |                         | $(1.4 \pm 0.2) \times 10^2$   |
| Telithromycin | $3.1 \pm 0.5$           | $1.32 \pm 0.04$                      |                         | $(4.3 \pm 0.7) \times 10^5$   |
| Tylosin       | $12 \pm 3$              | $0.37 \pm 0.04$                      | $340 \pm 120$           | $(3.0 \pm 0.8) \times 10^4$   |
| Spiramycin    | $10 \pm 1$              | $1.01 \pm 0.03$                      |                         | $(1.0 \pm 0.1) \times 10^5$   |
| Josamycin     | $34 \pm 4$              | $3.7 \pm 0.1$                        |                         | $(1.1 \pm 0.1) \times 10^5$   |
| GTP           | $13 \pm 2$              | $0.55 \pm 0.02$                      |                         | $(4.2 \pm 0.5) \times 10^4$   |

**Supplementary Table 16:** Oligonucleotides used in this study.

| Primer                                           | Direction | Sequence (5' to 3')                                                  |
|--------------------------------------------------|-----------|----------------------------------------------------------------------|
| <b>Site-directed mutagenesis</b>                 |           |                                                                      |
| A40M                                             | f         | ATGAATGAATCCGGCATGGATTTCCTTGTGGATTTCGACAGAGG                         |
|                                                  | r         | TCCAACAAGGAAATCCATGCCGATTTCATCTCTATTCCCTC                            |
| R111S                                            | f         | GGGCGCCTGCCGCTTCGGTCAGCATGGAAGGATATGCATGGA                           |
|                                                  | r         | TCCTTCCATGCTGACGGAAGCGGCAGGCTGCCCGCTAAGCAGC                          |
| E166T                                            | f         | GAGGTTTCGTGATGAGACGGCGCGAAATATGGAAGACATCAAGAGC                       |
|                                                  | r         | TTCCATATTTCGCGCCGTCTCATCACGAACCTCTTGGGGACTC                          |
| L211P                                            | f         | GGCGATCTTCATCCCCGCATATCCTGATTGATGAGCGCGTGC                           |
|                                                  | r         | ATCAATCAGGATATGCGGGGGATGAAGATCGCCATGGATGAGGGC                        |
| M40L                                             | f         | ATGAATCCGGCCTGGATTTCCTTGTGGATTTCG                                    |
|                                                  | r         | AAGGAAATCCAGGCCGGATTTCATCTCTATTCCCTCC                                |
| S111T                                            | f         | GCCTGCCGCTACCGTCAGCATGGAAGGATATGC                                    |
|                                                  | r         | CCATGCTGACGGTAGCGGCAGGCTGCCCGCTAAGC                                  |
| T166M                                            | f         | TCGTGATGAGATGGCGCGAAATATGGAAGACATCAAGAGCCG                           |
|                                                  | r         | TATTCGCGCCATCTCATCACGAACCTCTTGGGGACTC                                |
| P211G                                            | f         | CGATCTTCATCCCGGCATATCCTGATTGATGAGCGCGTGCAG                           |
|                                                  | r         | AATCAGGATATGCCCGGGATGAAGATCGCCATGGATGAGG                             |
| <b>Site-saturation combinatorial mutagenesis</b> |           |                                                                      |
| Backbone                                         | f         | CATATCCTGATTGATGAGCGC                                                |
|                                                  | r         | GCCGGATTCATCTCTATTCC                                                 |
| f1                                               | f         | GGGAATAGAGATGAATGAATCCGGC <sub>nnk</sub> GATTTTCCTTGTGGATTTCGACAGAGG |
|                                                  | r         | TCCATGCATATCCTTCCATGCTGAC <sub>mnn</sub> AGCGGCAGGCTGCCCGCTAAGCAGC   |
| f2                                               | f         | GTCAGCATGGAAGGATATGC                                                 |
|                                                  | r         | CTCATCACGAACCTCTTGGGGAC                                              |
| f3                                               | f         | GAGTCCCCAAGAGGTTTCGTGATGAG <sub>nnk</sub> GCGCGAAATATGGAAGACATCAAGA  |
|                                                  | r         | GCACGCGCTCATCAATCAGGATATG <sub>mnn</sub> GGGATGAAGATCGCCATGGATGAGG   |



**Supplementary Table 17:** Codon optimized *mphB* sequence.

| Gene        | DNA sequence                                                                                                                                                                                                                                                                                                                                                                                                                                                                                                                                                                                                                                                                                                                                                                                                                                                                                                                                                                                   |
|-------------|------------------------------------------------------------------------------------------------------------------------------------------------------------------------------------------------------------------------------------------------------------------------------------------------------------------------------------------------------------------------------------------------------------------------------------------------------------------------------------------------------------------------------------------------------------------------------------------------------------------------------------------------------------------------------------------------------------------------------------------------------------------------------------------------------------------------------------------------------------------------------------------------------------------------------------------------------------------------------------------------|
| <i>mphB</i> | ATGAGCAAAGATATTAACAGGTGATTGAAATTGCGAAAAACATAACCTGTTTCTGAAAGAAGAA<br>ACCATTCAGTTTAAACGAAAGCGGCCTGGATTTTCAGGCGGTGTTTGCGCAGGATAACAACGGCATTG<br>ATTGGGTGCTGCGCCTGCCGCGCCGCGAAGATGTGATGCCGCGCACCAAAGTGAAAAACAGGCG<br>CTGGATCTGGTGAACAAATATGCGATTAGCTTTCAGGCGCCGAACCTGGATTATTTATACCGAAGAAC<br>TGATTGCGTATAAAAACTGGATGGCGTGCCGGCGGGCACCATTGATCATAACATTGGCAACTATAT<br>TTGGGAAATTGATATTAACAACGTGCCGGAACCTGTTTCATAAAAGCCTGGGCCGCGTGCTGGCGGA<br>ACTGCATAGCATTCCGAGCAACAAAGCGGCGGCGCTGGATCTGGTGGTGCATACCCCGGAAGAAGC<br>GCGCATGAGCATGAAACAGCGCATGGATGCGGTGCGCGCGAAATTTGGCGTGGGCGAAAAACCTGT<br>GGAACCGCTGGCAGGCGTGGCTGAACGATGATGATATGTGGCCGAAAAAACCGGCCTGATTCATG<br>GCGATGTGCATGCGGGCCATACCATGATTGATAAAGATGCGAACGTGACCGGCCTGATTGATTGGA<br>CCGAAGCGAAAGTGACCGATGTGAGCCATGATTTTATTTTAACTATCGCGCGTTTGGCGAAGAAGG<br>CCTGGAAGCGCTGATTCTGGCGTATAAAGAAATTGGCGGCTATTATTGGCCGAAATGAAAGAACA<br>TATTATTGAACTGAACGCGGCGTATCCGGTGAGCATTGCGGAATTTGCGCTGGTGAGCGGCATTGA<br>AGAATATGAACAGATGGCGAAAGAAGCGCTGGAAGTGCAGGGCAGCTAA |

## Supplementary References

- 1 Shakya, T. & Wright, G. D. Nucleotide selectivity of antibiotic kinases. *Antimicrob. Agents Chemother.* **54**, 1909-1913 (2010). 10.1128/aac.01570-09.
- 2 Noguchi, N., Katayama, J. & O'Hara, K. Cloning and nucleotide sequence of the *mphB* gene for macrolide 2'-phosphotransferase II in *Escherichia coli*. *FEMS Microbiol. Lett.* **144**, 197-202 (1996).
- 3 Matsuoka, M., Inoue, M., Endo, Y. & Nakajima, Y. Characteristic expression of three genes, *msr(A)*, *mph(C)* and *erm(Y)*, that confer resistance to macrolide antibiotics on *Staphylococcus aureus*. *FEMS Microbiol. Lett.* **220**, 287-293 (2003).
- 4 Schluter, A. *et al.* Erythromycin resistance-conferring plasmid pRSB105, isolated from a sewage treatment plant, harbors a new macrolide resistance determinant, an integron-containing Tn402-like element, and a large region of unknown function. *Appl. Environ. Microbiol.* **73**, 1952-1960 (2007). 10.1128/aem.02159-06.
- 5 Szczepanowski, R., Krahn, I., Bohn, N., Puhler, A. & Schluter, A. Novel macrolide resistance module carried by the IncP-1beta resistance plasmid pRSB111, isolated from a wastewater treatment plant. *Antimicrob. Agents Chemother.* **51**, 673-678 (2007). 10.1128/aac.00802-06.
- 6 Nonaka, L., Maruyama, F., Suzuki, S. & Masuda, M. Novel macrolide-resistance genes, *mef(C)* and *mph(G)*, carried by plasmids from *Vibrio* and *Photobacterium* isolated from sediment and seawater of a coastal aquaculture site. *Lett. Appl. Microbiol.* **61**, 1-6 (2015). 10.1111/lam.12414.
- 7 Bhullar, K. *et al.* Antibiotic resistance is prevalent in an isolated cave microbiome. *PLoS One* **7**, e34953 (2012). 10.1371/journal.pone.0034953.
- 8 Pawlowski, A. C. *et al.* A diverse intrinsic antibiotic resistome from a cave bacterium. *Nat. Commun.* **7**, 13803 (2016). 10.1038/ncomms13803.
- 9 Wang, C. *et al.* Functional characterization and phylogenetic analysis of acquired and intrinsic macrolide phosphotransferases in the *Bacillus cereus* group. *Environ. Microbiol.* **17**, 1560-1573 (2015). 10.1111/1462-2920.12578.
- 10 Yang, J. *et al.* Characterization of a multiresistant mosaic plasmid from a fish farm Sediment *Exiguobacterium* sp. isolate reveals aggregation of functional clinic-associated antibiotic resistance genes. *Appl. Environ. Microbiol.* **80**, 1482-1488 (2014). 10.1128/AEM.03257-13.
- 11 Roberts, M. C., Schwarz, S. & Aarts, H. J. Erratum: Acquired antibiotic resistance genes: an overview. *Front. Microbiol.* **3**, 384 (2012). 10.3389/fmicb.2012.00384.
- 12 Roberts, M. C. Update on macrolide–lincosamide–streptogramin, ketolide, and oxazolidinone resistance genes. *FEMS Microbiol. Lett.* **282**, 147-159 (2008). 10.1111/j.1574-6968.2008.01145.x.
- 13 Kunst, F. *et al.* The complete genome sequence of the gram-positive bacterium *Bacillus subtilis*. *Nature* **390**, 249-256 (1997). 10.1038/36786.
